# Supplementary material for: Elucidation of the intrinsic optical properties of hydrogen-bonded and protonated flavin chromophores by photodissociation action spectroscopy
Source: Royal Society of Chemistry journal article supplement (doi:10.1039/c8cp05368e), 2018-01-01
Supplement: c8cp05368e1.pdf [file c8cp05368e1.pdf]

## Electronic Supporting Information

# Elucidation of the intrinsic optical properties of hydrogen-bonded and protonated flavin chromophores by photodissociation action spectroscopy

Kasper Lincke,<sup>a</sup> Jeppe Langeland,<sup>b</sup> Andreas Østergaard Madsen,<sup>a</sup> Hjalte V. Kiefer,<sup>b</sup>  
Louise Skov,<sup>a</sup> Elisabeth Gruber,<sup>b</sup> Kurt V. Mikkelsen,<sup>a,\*</sup> Lars H. Andersen,<sup>b,\*</sup> Mogens Brøndsted  
Nielsen <sup>a,\*</sup>

*<sup>a)</sup> Department of Chemistry, University of Copenhagen, Universitetsparken 5, DK-2100  
Copenhagen Ø, Denmark. E-mail: kmi@chem.ku.dk, mbn@chem.ku.dk*

*<sup>b)</sup> Department of Physics and Astronomy, Aarhus University, Ny Munkegade 120, DK-8000  
Aarhus C, Denmark. E-mail: lha@phys.au.dk*

## Contents

|                                                    |            |
|----------------------------------------------------|------------|
| <b>Synthesis protocols .....</b>                   | <b>S2</b>  |
| <b>UV-Vis absorption spectra in solution .....</b> | <b>S4</b>  |
| <b>NMR spectra .....</b>                           | <b>S6</b>  |
| <b>Gas-phase action spectroscopy studies .....</b> | <b>S10</b> |
| <b>Calculational data .....</b>                    | <b>S13</b> |

## Synthesis protocols

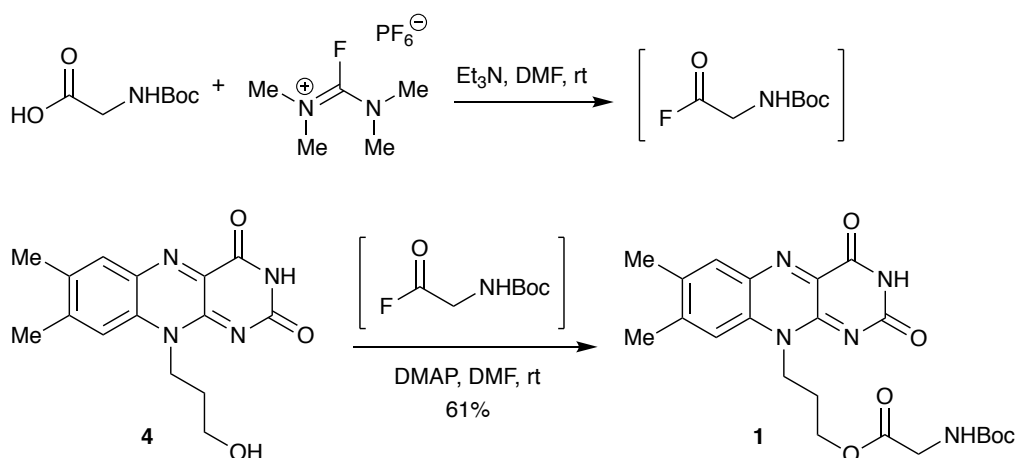

*Synthesis of 1:* To a solution of (*tert*-butoxycarbonyl)glycine (43.2 mg, 0.25 mmol) in anhydrous DMF (10 mL; dried over 4Å molecular sieves) under argon was added tetramethyl fluoroformadanium (TFFH) (81.8 mg, 0.31 mmol) at rt. Then NEt<sub>3</sub> (0.2 mL) was added, and after stirring for ca. 15 min. (during which *tert*-butyl (2-fluoro-2-oxoethyl)carbamate was formed), compound **4** (35.5 mg, 0.12 mmol) dissolved in dry DMF (ca. 3 mL) was added followed by *N,N*-dimethylaminopyridine (DMAP) (8.9 mg). The mixture was stirred overnight at rt and then concentrated *in vacuo* in the presence of Celite. Dry column vacuum chromatography (SiO<sub>2</sub>, Gradient: heptane → CHCl<sub>3</sub> → 4 % v/v MeOH in CHCl<sub>3</sub>) gave **1** as an orange solid (33.4 mg, 61%). M.p. 210 °C (decomp.). <sup>1</sup>H-NMR (300 MHz, CDCl<sub>3</sub>) δ: 11.31 (s, 1H); 7.87 (s, 1H), 7.77 (s, 1H), 7.21 (t, *J* = 6.7 Hz, 1H), 4.64 (t, 2H, *J* = 6.5 Hz), 4.19 (t, *J* = 6.5 Hz, 2H), 3.71 (d, *J* = 6.7 Hz, 2H), 2.50 (s, 3H), 2.38 (s, 3H), 2.08 (m, *J* = 6.5 Hz, 2H), 1.36 ppm (s, 9H) ppm; <sup>13</sup>C-NMR (75 MHz, DMSO-*d*<sub>6</sub>) δ: 170.1, 159.6, 155.4 (2 C), 149.9, 146.3, 136.9, 135.5, 133.5, 130.8, 130.4, 115.6, 78.0, 61.6, 41.7, 40.9, 27.9, 25.6, 20.3, 18.5; MS (FAB): *m/z* 457 (M<sup>+</sup>); Calc. for C<sub>22</sub>H<sub>27</sub>N<sub>5</sub>O<sub>6</sub> • 1/3 H<sub>2</sub>O: C, 57.01; H, 6.02; N, 15.11; Found: C, 56.90; H, 5.85 %; N, 14.85.

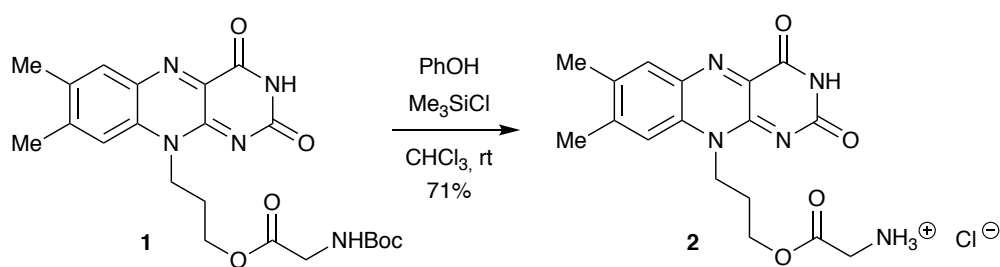

**Synthesis of 2:** To a solution of compound **1** (16.5 mg, 0.036 mmol) in  $\text{CHCl}_3$  (1 mL) was added phenol (100 mg, 0.92 mmol) and trimethylsilylchloride (0.12 mL, 1.1 mmol), resulting in an orange precipitate. The mixture was stirred at another 3 h at rt. The product was filtered and triturated with  $\text{CHCl}_3$ , and filtered to provide the product **2** as an orange solid (9.1 mg, 71%). M.p. 212 °C (decomp.).  $^1\text{H-NMR}$  (300 MHz,  $\text{DMSO-}d_6$ )  $\delta$ : 11.39 (s, 1H), 8.34 (br s, 3H), 7.94 (s, 1H), 7.86 (s, 1H), 4.73 (t,  $J = 6.5$  Hz, 2H), 4.30 (t,  $J = 6.5$  Hz, 2H), 3.95 (s, 2H), 2.53 (s, 3H), 2.41 (s, 3H), 2.13 (m,  $J = 6.5$  Hz, 2H) ppm;  $^{13}\text{C-NMR}$  (75 MHz,  $\text{DMSO-}d_6$ )  $\delta$ : 168.4, 160.7, 156.9, 150.9, 147.5, 137.8, 136.7, 134.7, 131.8, 131.4, 116.7, 63.4, 41.6, 26.6, 21.3, 19.5 ppm, one signal overlapping; MS (ESP):  $m/z$  358 ( $[\text{M-Cl}]^+$ ). HR-MS (ESP):  $m/z$  358.1510; calc. for  $\text{C}_{17}\text{H}_{20}\text{N}_5\text{O}_4$ : 358.1510.

## UV-Vis absorption spectra in solution

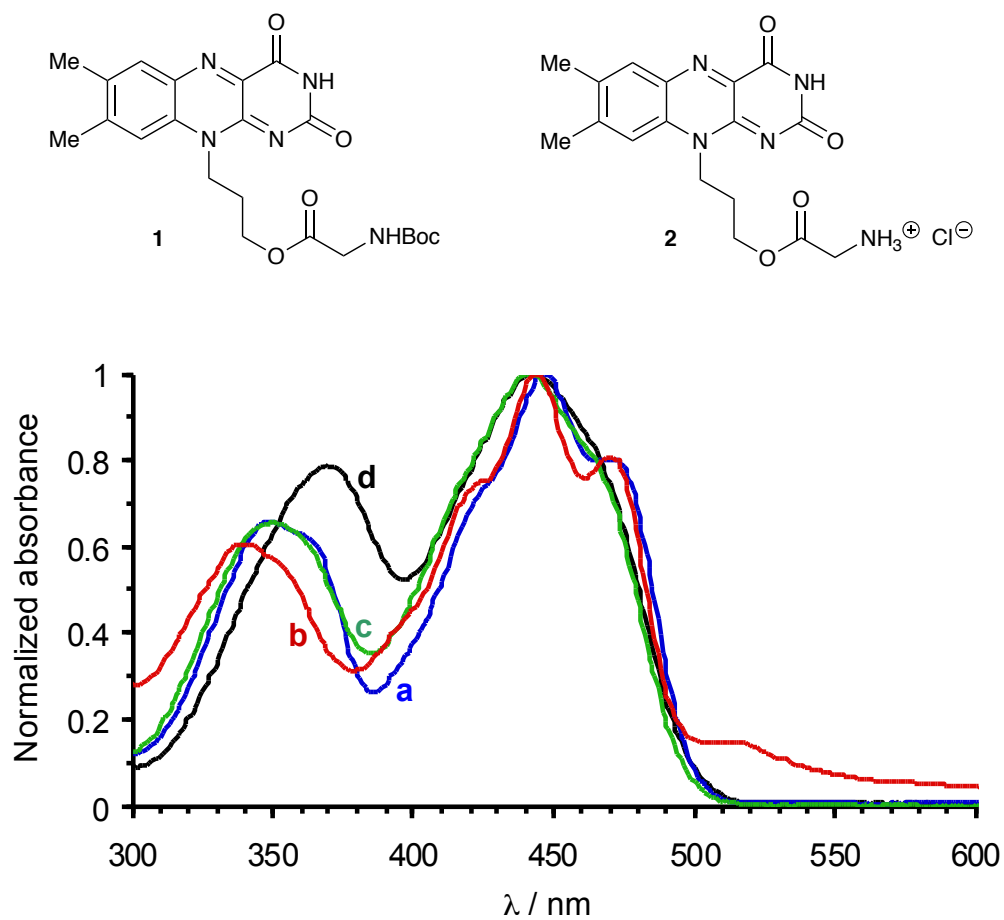

**Figure S1.** UV-Vis absorption spectra of a) **1** in  $\text{CHCl}_3$  (blue curve), b) **1** in PhMe (red curve), c) **1** in MeOH (green curve), and d) **2** in  $\text{H}_2\text{O}$  (black curve).

## Protonation studies

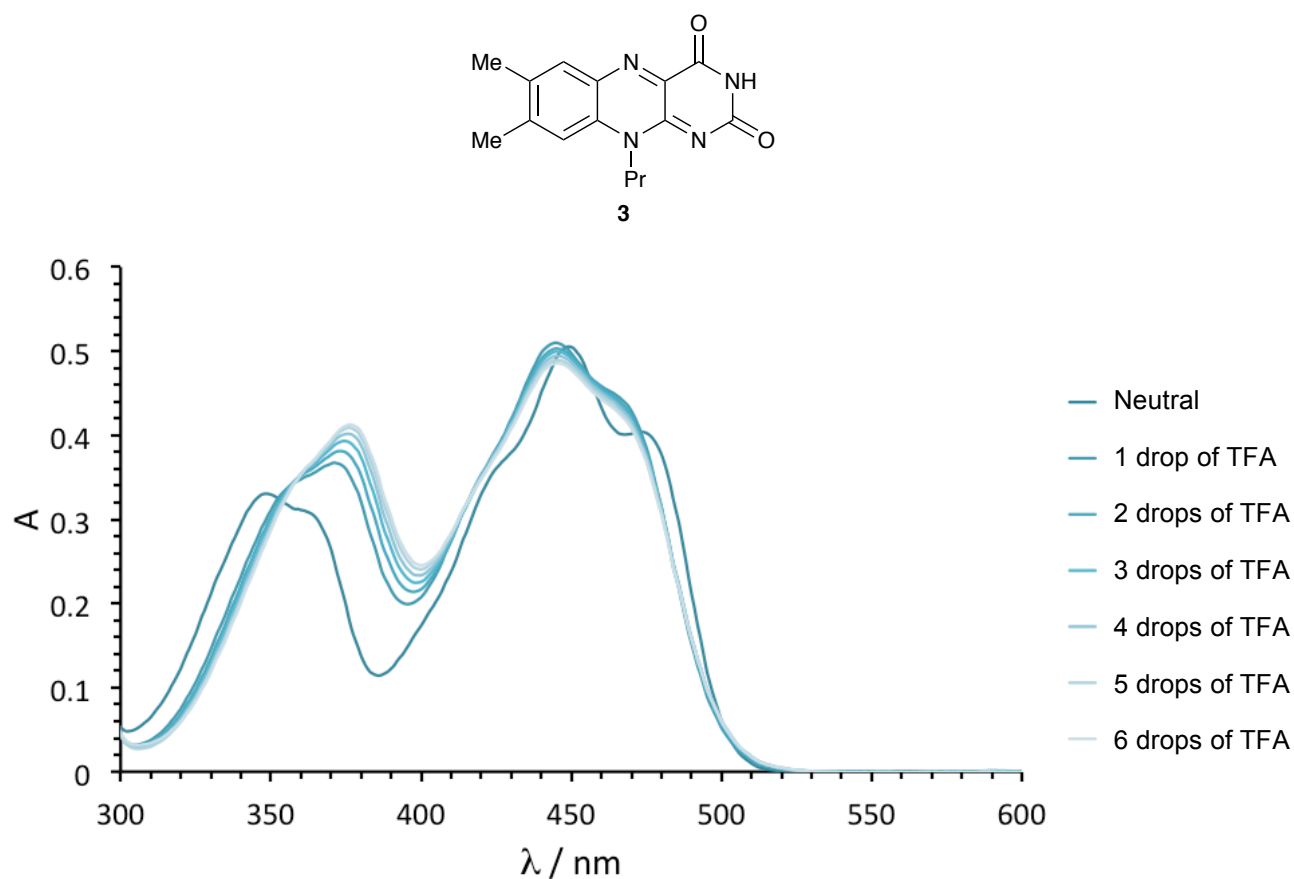

**Figure S2.** UV-Vis absorption spectra **3** in chloroform before and after addition of drops of trifluoroacetic acid (TFA).

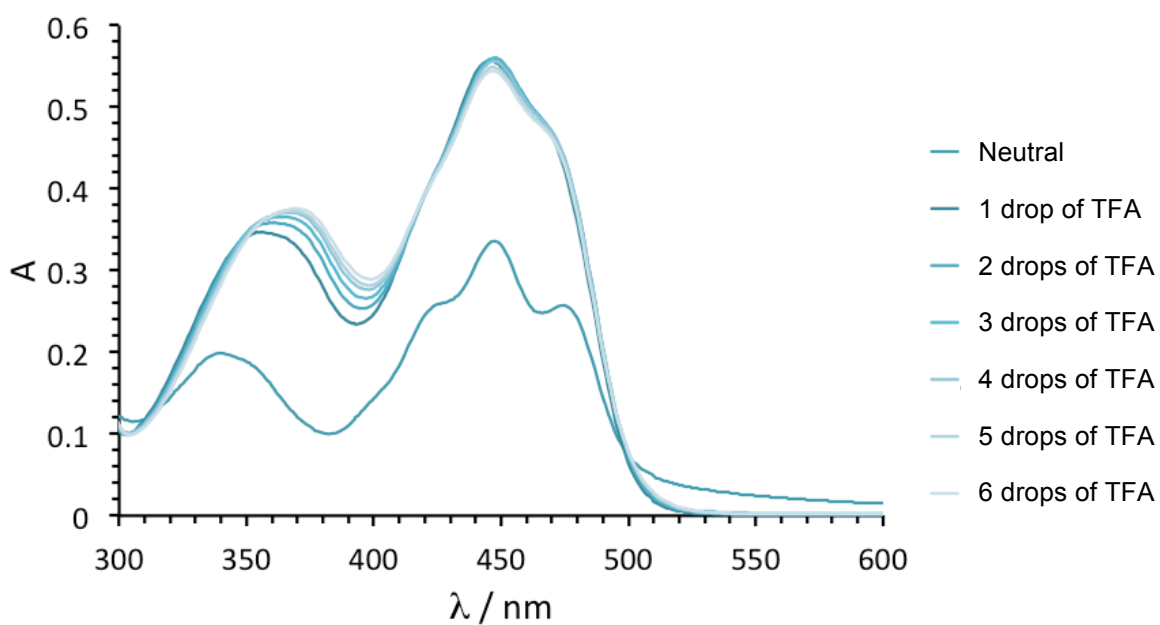

**Figure S3.** UV-Vis absorption spectra **3** in toluene before and after addition of drops of trifluoroacetic acid (TFA).

## NMR spectra

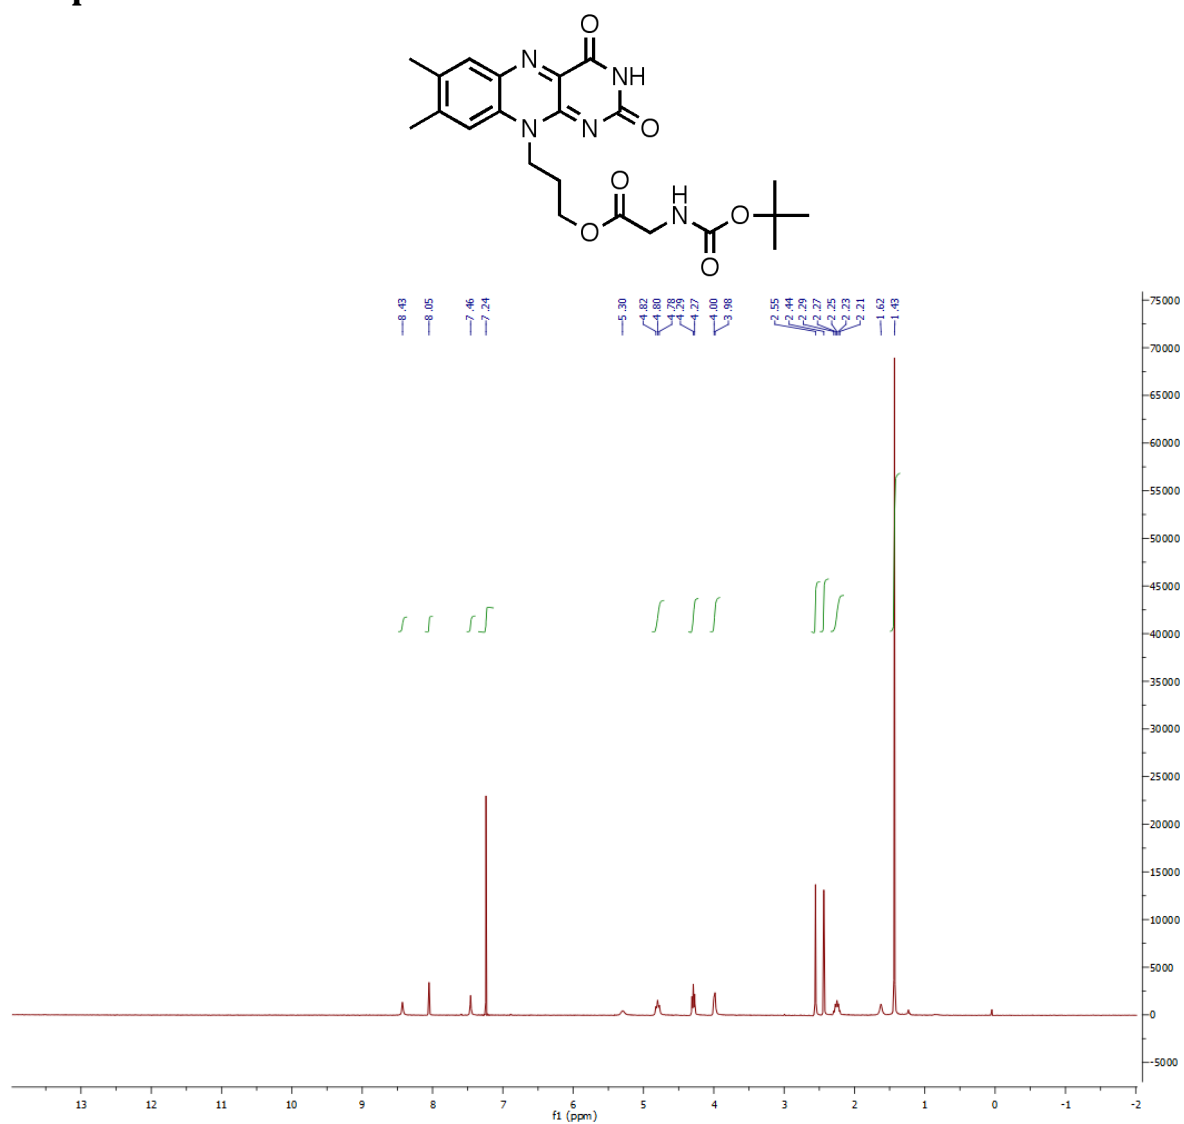

**Figure S4.** <sup>1</sup>H NMR spectrum (300 MHz) of **1** in CDCl<sub>3</sub>.

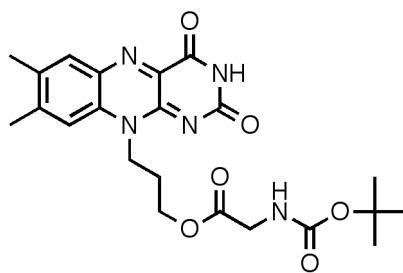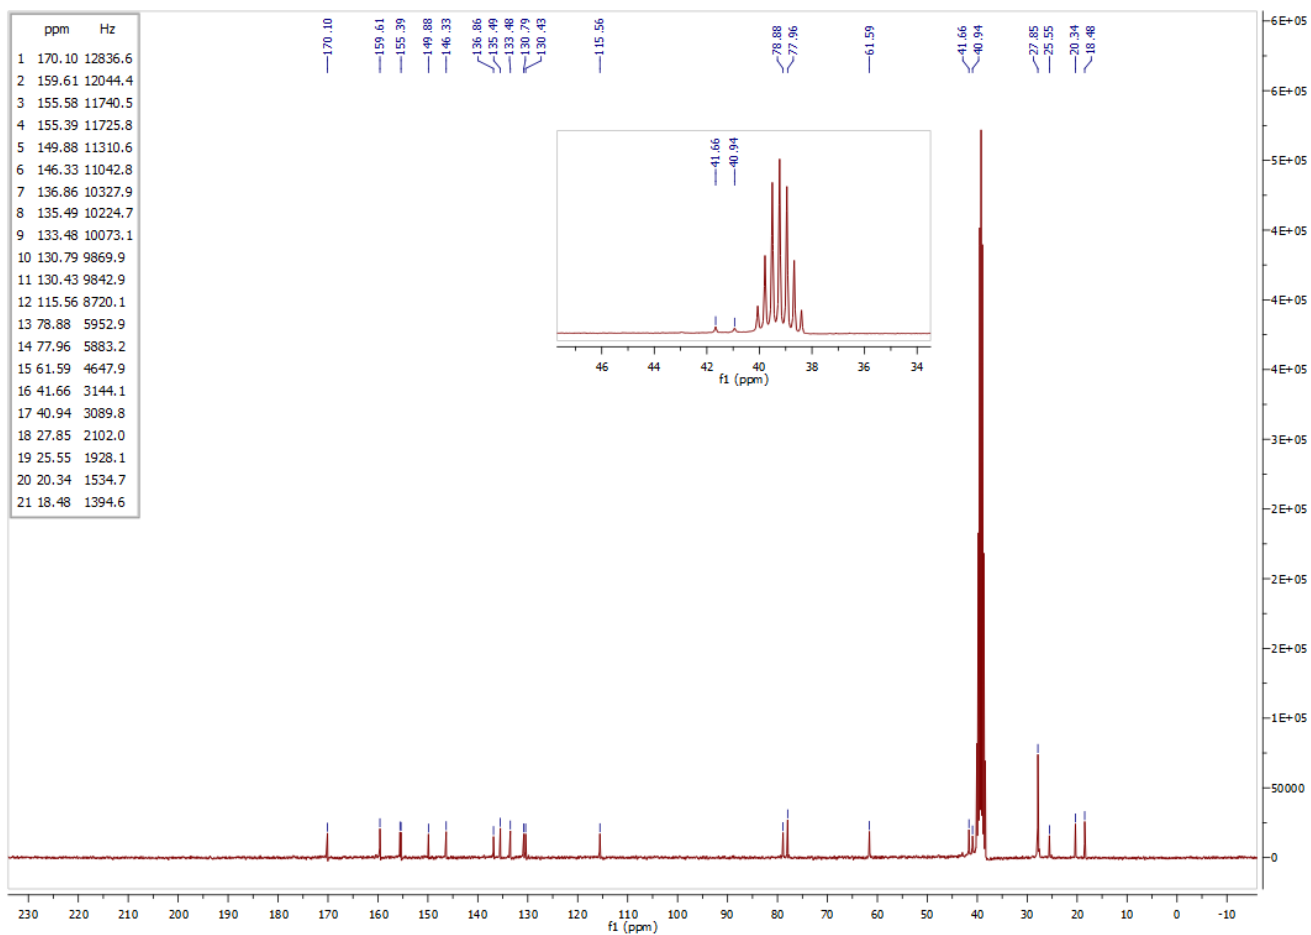

**Figure S5.**  $^{13}\text{C}$  NMR spectrum (75 MHz) of **1** in  $\text{DMSO-}d_6$ .

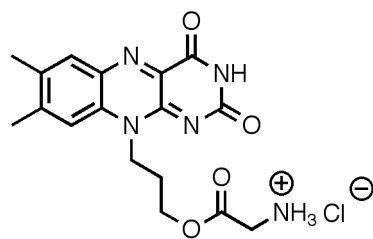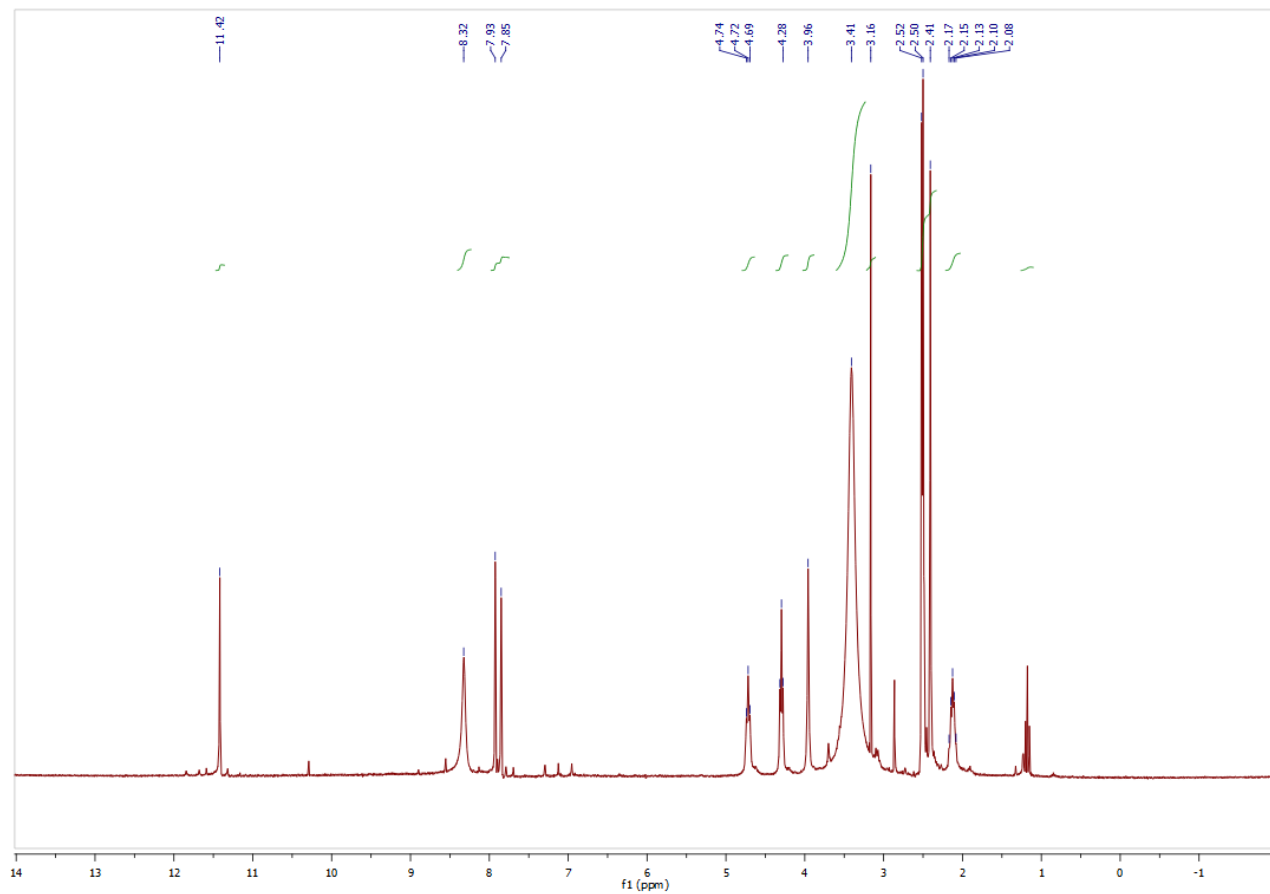

**Figure S6.** <sup>1</sup>H NMR spectrum (300 MHz) of **2** in DMSO-*d*<sub>6</sub>.



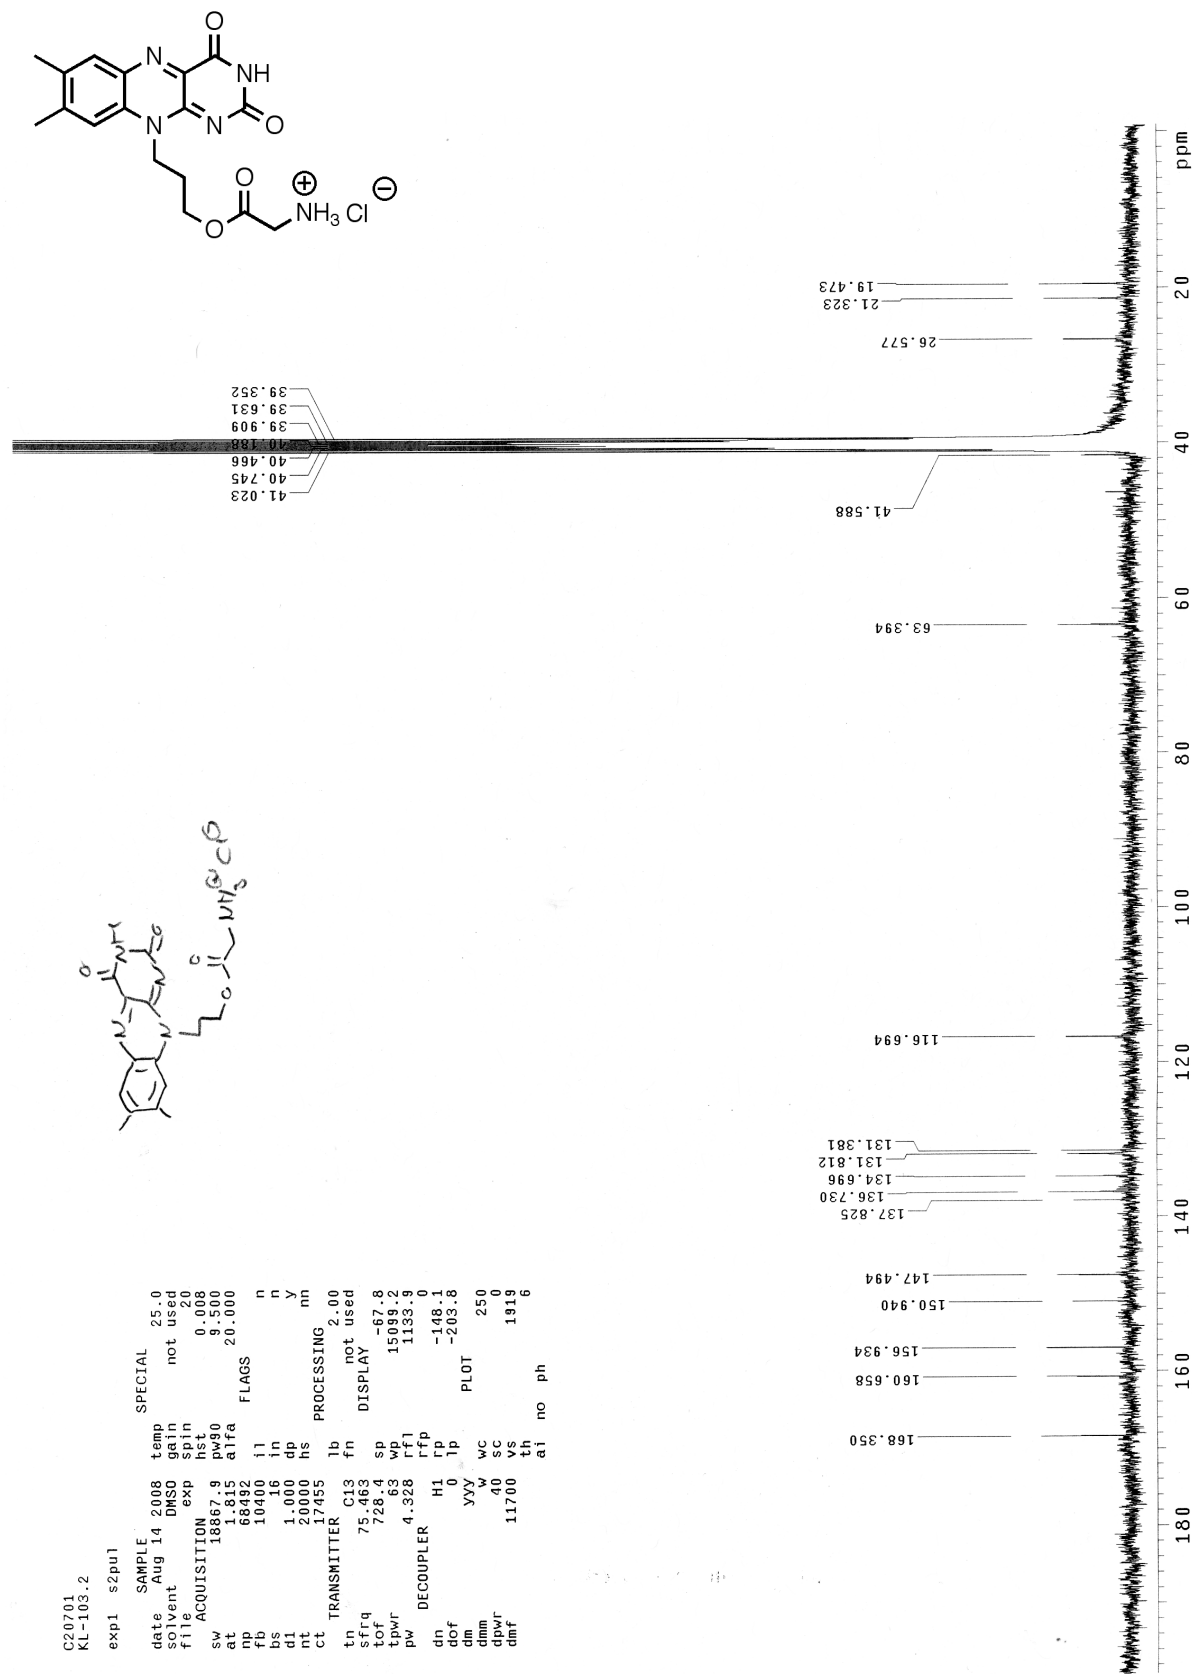

Figure S7. <sup>1</sup>H NMR spectrum (75 MHz) of 2 in DMSO-d<sub>6</sub>.

## Gas-phase action spectroscopy studies

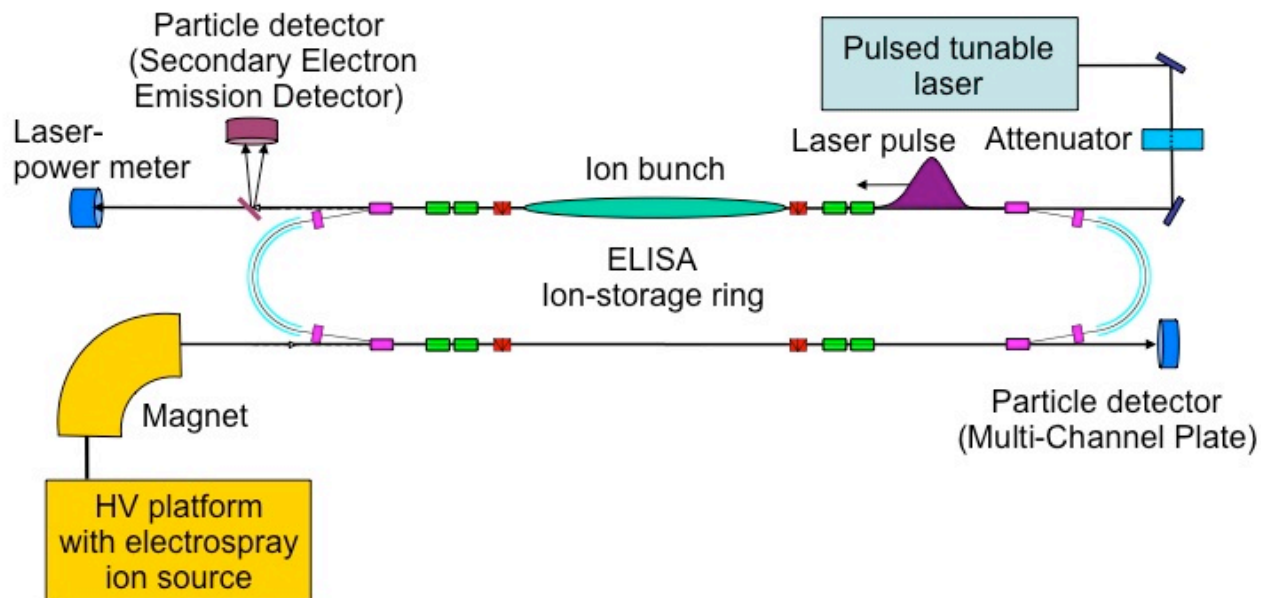

**Figure S8.** Schematic drawing of the ELISA storage ring in Aarhus, where the action-absorption spectra were obtained.

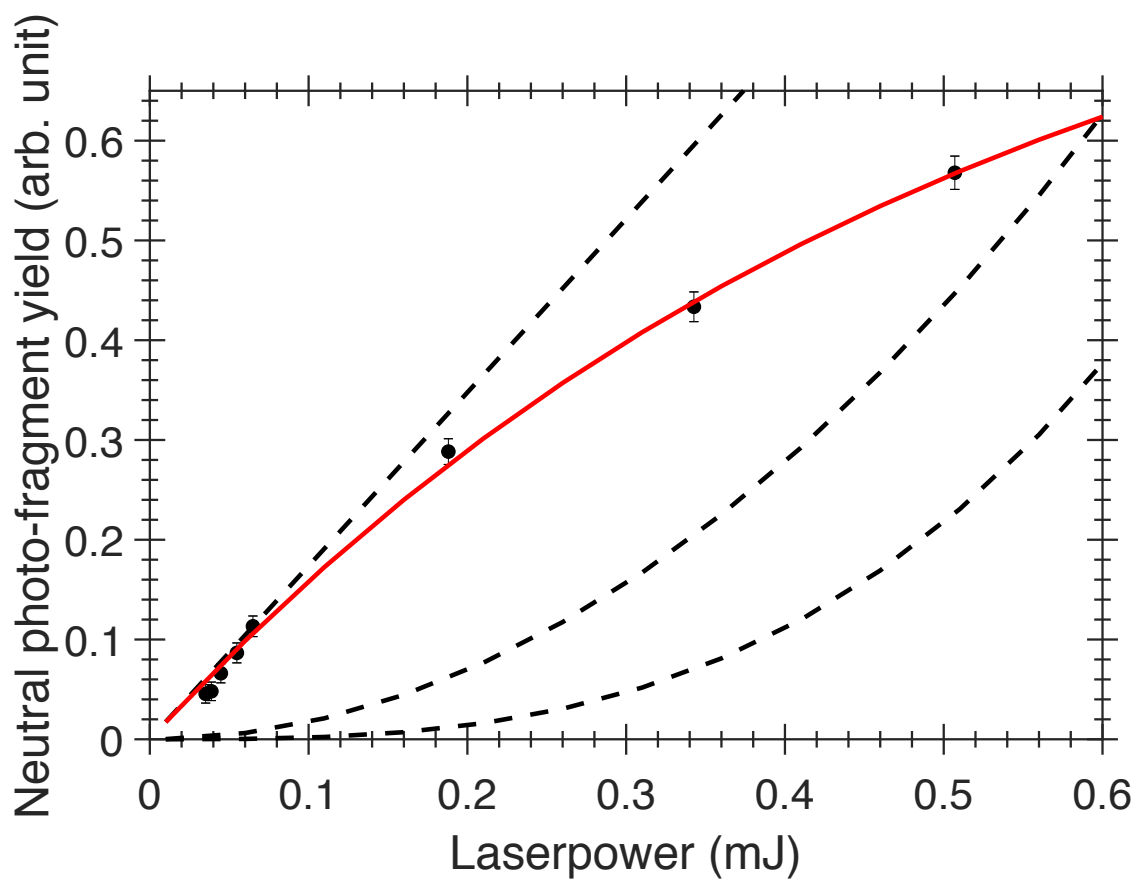

**Figure S9.** Yield of neutral photo-fragments of  $3\bullet\text{H}^+$  as a function of laser power (power dependence) at 260 nm. At low power (before saturation) the yield is proportional to  $P^1$ , which is consistent with a one-photon process. Dashed lines indicate 1, 2 and 3 photon dependencies respectively.

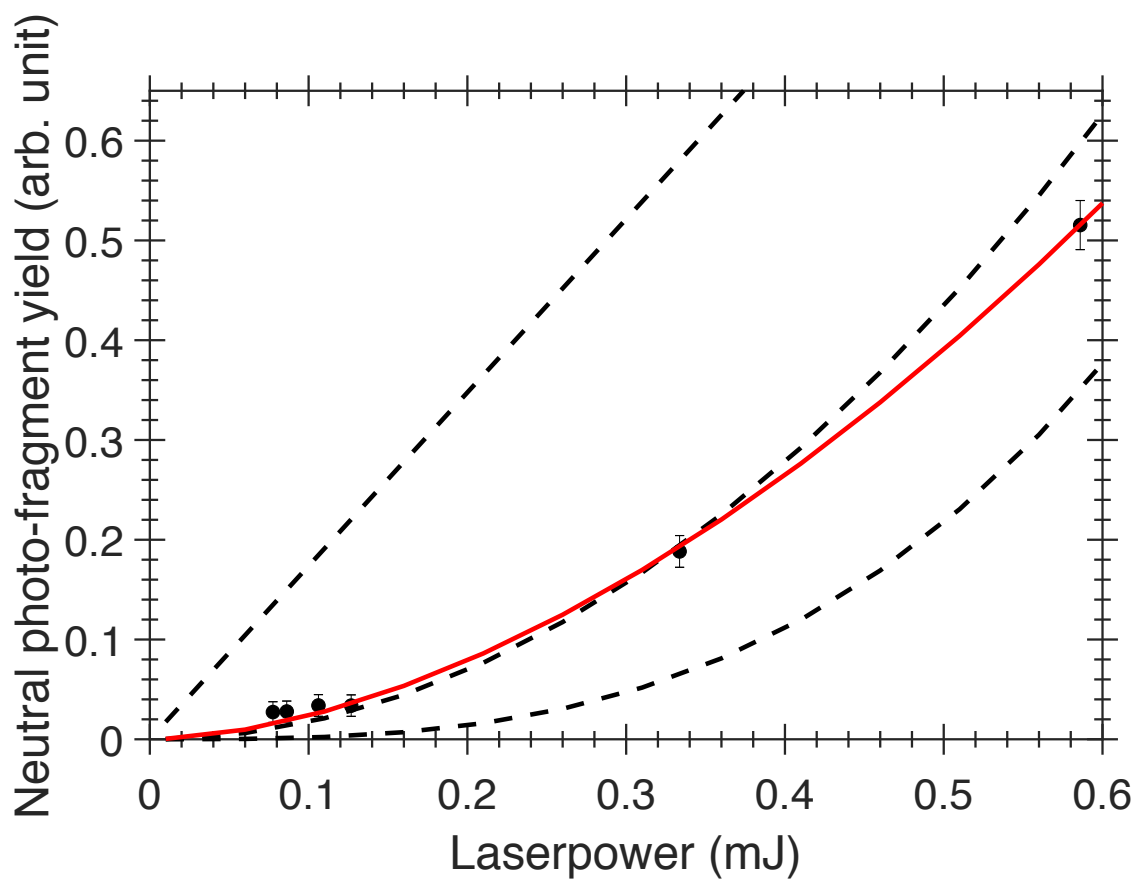

**Figure S10.** Yield of neutral photo-fragments of  $3\bullet\text{H}^+$  as a function of laser power (power dependence) at 410 nm. Measurement is consistent with a two-photon process. The dashed lines represent 1, 2 and 3 photon dependencies respectively.

## Computational data

**Table S1.** Relative Gibbs free energies in eV (calculated as electronic energy with thermal correction at 298.15 K) of  $\mathbf{3}\cdot\mathbf{H}^+$  with the proton located at each of the various heteroatoms obtained computationally using different methods and the 6-311+G(d,p) basis set. Boltzmann factors for the distribution between protonated species are included in brackets.

| Method         | <i>N1</i>         | <i>O2</i>  | <i>N3</i>                    | <i>O4</i>                     | <i>N5</i>                     | <i>N10</i>                    |
|----------------|-------------------|------------|------------------------------|-------------------------------|-------------------------------|-------------------------------|
| $\omega$ B97XD | 0.0002<br>(0.991) | 0<br>(1.0) | 0.306<br>(10 <sup>-6</sup> ) | 0.748<br>(10 <sup>-13</sup> ) | 0.550<br>(10 <sup>-10</sup> ) | 1.979<br>(10 <sup>-34</sup> ) |
| CAM-B3LYP      | 0.025<br>(0.382)  | 0<br>(1.0) | 0.277<br>(10 <sup>-5</sup> ) | 0.423<br>(10 <sup>-8</sup> )  | 0.562<br>(10 <sup>-10</sup> ) | 2.014<br>(10 <sup>-35</sup> ) |
| HSEH1PBE       | 0.049<br>(0.147)  | 0<br>(1.0) | 0.344<br>(10 <sup>-6</sup> ) | 0.362<br>(10 <sup>-7</sup> )  | 0.478<br>(10 <sup>-9</sup> )  | 2.092<br>(10 <sup>-36</sup> ) |
| LSDA           | 0.042<br>(0.193)  | 0<br>(1.0) | 0.340<br>(10 <sup>-6</sup> ) | 0.210<br>(10 <sup>-4</sup> )  | 0.243<br>(10 <sup>-5</sup> )  | 2.278<br>(10 <sup>-39</sup> ) |

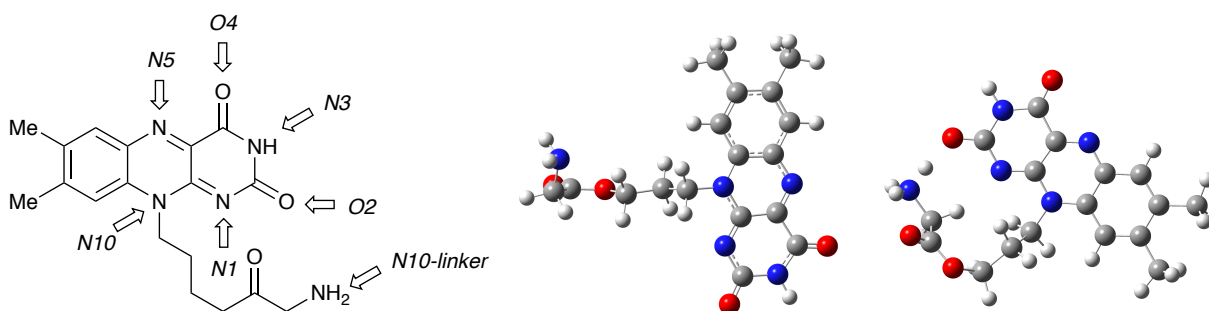

**Figure S11.** Left: Numbering of protonation sites of the neutral, deprotonated compound **2**.

Middle: Optimized structure of the neutral, deprotonated compound **2**. Right: Optimized structure of the *N10-linker*-protonated compound revealing a hydrogen bond between  $\text{NH}_3^+$  and  $\text{O}_2$ .

**Table S2.** Relative Gibbs free energies in eV (calculated as electronic energy with thermal correction at 298.15 K) of **2** with the proton located at each of the various heteroatoms obtained computationally using different methods and the 6-311+G(d,p) basis set. Boltzmann factors for the distribution between protonated species are included in brackets.

| Method         | <i>N1</i>               | <i>O2</i>               | <i>N3</i>               | <i>O4</i>               | <i>N5</i>               | <i>N10</i>              | <i>N10-linker</i> |
|----------------|-------------------------|-------------------------|-------------------------|-------------------------|-------------------------|-------------------------|-------------------|
| $\omega$ B97XD | 0.706<br>( $10^{-12}$ ) | 0.678<br>( $10^{-12}$ ) | 0.977<br>( $10^{-17}$ ) | 1.405<br>( $10^{-24}$ ) | 1.217<br>( $10^{-21}$ ) | 2.693<br>( $10^{-46}$ ) | 0<br>(1)          |
| CAM-B3LYP      | 0.640<br>( $10^{-11}$ ) | 0.593<br>( $10^{-11}$ ) | 0.875<br>( $10^{-15}$ ) | 1.306<br>( $10^{-23}$ ) | 1.139<br>( $10^{-20}$ ) | 2.648<br>( $10^{-45}$ ) | 0<br>(1)          |
| HSEH1PBE       | 0.697<br>( $10^{-12}$ ) | 0.624<br>( $10^{-11}$ ) | 1.021<br>( $10^{-18}$ ) | 1.284<br>( $10^{-22}$ ) | 1.090<br>( $10^{-19}$ ) | 2.747<br>( $10^{-47}$ ) | 0<br>(1)          |

**Coordinates** – Optimized structures were obtained with functional  $\omega$ B97X-D and basis set 6-311+G(d,p).

**Deprotonated compound 2 (with neutral amino group)**

Energy: -774274.7631122 Hartrees

|   |          |          |          |
|---|----------|----------|----------|
| C | 1.17303  | 3.42883  | 0.19883  |
| C | 0.54041  | 2.21909  | 0.42305  |
| C | 1.22987  | 1.00623  | 0.28956  |
| C | 2.58319  | 1.03775  | -0.09189 |
| C | 3.21358  | 2.27326  | -0.31097 |
| C | 2.54098  | 3.46517  | -0.17234 |
| C | 2.72652  | -1.23807 | -0.08843 |
| C | 1.32587  | -1.39048 | 0.29167  |
| C | 1.38901  | -3.70462 | 0.25298  |
| C | 3.51259  | -2.49901 | -0.28937 |
| H | -0.50806 | 2.22739  | 0.68904  |
| H | 4.25844  | 2.24531  | -0.59946 |
| H | 3.21872  | -4.51752 | -0.22141 |
| N | 3.31287  | -0.10713 | -0.26403 |
| N | 0.63702  | -0.22648 | 0.51232  |
| N | 0.70338  | -2.52203 | 0.43754  |
| N | 2.75208  | -3.62885 | -0.09944 |
| O | 4.67993  | -2.53099 | -0.58553 |
| O | 0.87941  | -4.79075 | 0.37893  |
| C | -0.76428 | -0.33047 | 0.92676  |
| C | -1.70873 | -0.29282 | -0.27081 |
| H | -0.97075 | 0.47418  | 1.63404  |
| H | -0.85908 | -1.28010 | 1.45138  |
| C | -3.14094 | -0.50511 | 0.17719  |
| H | -1.63463 | 0.66691  | -0.78989 |
| H | -1.42397 | -1.07685 | -0.97631 |
| H | -3.26547 | -1.52129 | 0.56724  |
| H | -3.43041 | 0.21549  | 0.94712  |
| O | -3.96727 | -0.32681 | -0.97676 |
| C | -5.30739 | -0.30108 | -0.88697 |
| O | -5.95917 | -0.16618 | -1.88456 |
| N | -5.75006 | 0.84917  | 1.21785  |
| C | -5.95411 | -0.40430 | 0.49076  |
| H | -6.25275 | 1.60265  | 0.76318  |
| H | -6.11134 | 0.77323  | 2.16050  |
| C | 3.23515  | 4.77735  | -0.41560 |
| C | 0.40037  | 4.71012  | 0.34394  |
| H | 3.20993  | 5.41225  | 0.47514  |
| H | 2.75604  | 5.33705  | -1.22454 |
| H | 4.27945  | 4.62064  | -0.68776 |
| H | 0.40190  | 5.27561  | -0.59250 |
| H | -0.63637 | 4.52202  | 0.62522  |
| H | 0.84959  | 5.35350  | 1.10634  |

|   |          |          |         |
|---|----------|----------|---------|
| H | -7.00316 | -0.65948 | 0.31319 |
| H | -5.49902 | -1.21695 | 1.06305 |

**Compound 2 with proton at *N10-linker* (but no counter anion) – with the NH<sub>3</sub><sup>+</sup> group H-bonded to *O2***

Energy: -774531.9415302 Hartrees

|   |          |          |          |
|---|----------|----------|----------|
| C | 4.00630  | 1.58140  | 0.09979  |
| C | 2.64235  | 1.53976  | 0.32905  |
| C | 1.93901  | 0.33216  | 0.25705  |
| C | 2.64014  | -0.84707 | -0.07655 |
| C | 4.03034  | -0.78879 | -0.29777 |
| C | 4.72428  | 0.39210  | -0.21290 |
| C | 0.73119  | -2.09154 | -0.03565 |
| C | -0.08014 | -0.94583 | 0.29351  |
| C | -2.05063 | -2.14289 | 0.22380  |
| C | 0.03517  | -3.40468 | -0.18886 |
| H | 2.13242  | 2.46872  | 0.54609  |
| H | 4.52618  | -1.72071 | -0.54393 |
| H | -1.88645 | -4.14219 | -0.15579 |
| N | 2.01321  | -2.04331 | -0.19887 |
| N | 0.57281  | 0.23039  | 0.48730  |
| N | -1.39728 | -0.96719 | 0.41968  |
| N | -1.34550 | -3.29547 | -0.03154 |
| O | 0.57259  | -4.44714 | -0.42651 |
| O | -3.28653 | -2.21692 | 0.26569  |
| C | -0.22221 | 1.38538  | 0.92099  |
| C | -0.92384 | 2.05966  | -0.25888 |
| H | 0.42904  | 2.06556  | 1.46550  |
| H | -0.95385 | 1.00023  | 1.63139  |
| C | -2.03910 | 3.01225  | 0.18951  |
| H | -0.19975 | 2.58237  | -0.88711 |
| H | -1.36601 | 1.27706  | -0.87876 |
| H | -2.33982 | 2.83113  | 1.22629  |
| H | -1.74370 | 4.05640  | 0.11680  |
| O | -3.17868 | 2.91249  | -0.68136 |
| C | -4.01820 | 1.89251  | -0.60177 |
| O | -4.82101 | 1.67036  | -1.46559 |
| N | -4.87346 | -0.14916 | 0.39754  |
| C | -3.98094 | 1.00828  | 0.64781  |
| H | -4.26524 | -1.03819 | 0.31983  |
| H | -5.36489 | 0.02959  | -0.49102 |
| H | -5.56305 | -0.28315 | 1.13274  |
| C | 6.20663  | 0.43598  | -0.45362 |
| C | 4.73273  | 2.89211  | 0.17689  |



|   |          |          |          |
|---|----------|----------|----------|
| H | 6.73749  | 0.82017  | 0.42181  |
| H | 6.45132  | 1.09120  | -1.29429 |
| H | 6.59592  | -0.55741 | -0.67553 |
| H | 5.22563  | 3.11906  | -0.77255 |
| H | 4.05885  | 3.71447  | 0.41770  |
| H | 5.51511  | 2.85630  | 0.94021  |
| H | -2.98189 | 0.60979  | 0.83703  |
| H | -4.32531 | 1.57784  | 1.51235  |

### Compound 3

|   |          |          |          |
|---|----------|----------|----------|
| C | -3.43000 | 0.20260  | -0.15030 |
| C | -2.23340 | 0.87340  | -0.26950 |
| C | -0.99370 | 0.19030  | -0.19300 |
| C | -1.00370 | -1.24300 | 0.02860  |
| C | -2.22830 | -1.90590 | 0.14340  |
| C | -3.43850 | -1.23110 | 0.05800  |
| C | 1.27210  | -1.35050 | 0.03130  |
| C | 1.39070  | 0.07890  | -0.19390 |
| C | 3.74010  | 0.02680  | -0.16630 |
| C | 2.54990  | -2.14220 | 0.15070  |
| H | -2.25240 | 1.94410  | -0.41380 |
| H | -2.19520 | -2.97730 | 0.30390  |
| N | 0.13970  | -1.97240 | 0.13230  |
| N | 0.20590  | 0.81480  | -0.31830 |
| N | 2.51470  | 0.72240  | -0.29250 |
| N | 3.68520  | -1.35280 | 0.03890  |
| O | 2.57810  | -3.33080 | 0.32680  |
| O | 4.78560  | 0.61960  | -0.23780 |
| C | 0.31460  | 2.28730  | -0.54230 |
| C | 0.28720  | 3.07940  | 0.77160  |
| H | -0.49230 | 2.57400  | -1.21450 |
| H | 1.25560  | 2.44780  | -1.06070 |
| C | 0.40280  | 4.58160  | 0.50290  |
| H | -0.63410 | 2.86280  | 1.32250  |
| H | 1.11870  | 2.74820  | 1.39980  |
| H | 0.39120  | 5.13530  | 1.44340  |
| H | 1.33570  | 4.82680  | -0.01050 |
| H | -0.42540 | 4.95270  | -0.10750 |
| C | -4.72950 | -1.97450 | 0.18220  |
| C | -4.72480 | 0.95470  | -0.23480 |
| H | -5.32520 | -1.59800 | 1.02070  |
| H | -5.34810 | -1.84710 | -0.71270 |
| H | -4.56680 | -3.04060 | 0.33320  |
| H | -4.56330 | 2.02110  | -0.38890 |

|   |          |          |           |
|---|----------|----------|-----------|
| H | -5.34370 | 0.58450  | -1.05780  |
| H | -5.31520 | 0.83040  | 0.67820   |
| H | 4.57940  | -1.82710 | 0.1170037 |

**Compound 3 protonated at O2 - 6•O2-H<sup>+</sup>**

Energy: -596798.9744427 Hartrees

|   |          |          |          |
|---|----------|----------|----------|
| C | 3.42672  | 0.19270  | 0.15320  |
| C | 2.22517  | 0.86177  | 0.27249  |
| C | 1.00919  | 0.16873  | 0.19662  |
| C | 1.03120  | -1.23539 | -0.01900 |
| C | 2.27351  | -1.90204 | -0.13292 |
| C | 3.45885  | -1.22454 | -0.04933 |
| C | -1.23969 | -1.33205 | -0.03047 |
| C | -1.35477 | 0.07218  | 0.18854  |
| C | -3.61469 | -0.00347 | 0.15230  |
| C | -2.48951 | -2.13349 | -0.16224 |
| H | 2.24403  | 1.93346  | 0.41122  |
| H | 2.24012  | -2.97355 | -0.29171 |
| N | -0.09783 | -1.95452 | -0.12453 |
| N | -0.22001 | 0.78687  | 0.31846  |
| N | -2.53595 | 0.71941  | 0.27374  |
| N | -3.64626 | -1.33512 | -0.05242 |
| O | -2.55735 | -3.31024 | -0.34118 |
| O | -4.80057 | 0.54897  | 0.22403  |
| C | -0.30588 | 2.24821  | 0.54126  |
| C | -0.22296 | 3.02405  | -0.77036 |
| H | 0.49238  | 2.51972  | 1.23101  |
| H | -1.25291 | 2.43667  | 1.04006  |
| C | -0.25677 | 4.52778  | -0.51610 |
| H | 0.69195  | 2.75162  | -1.30529 |
| H | -1.06343 | 2.72765  | -1.40474 |
| H | -0.21187 | 5.07598  | -1.45798 |
| H | -1.17473 | 4.82379  | -0.00166 |
| H | 0.59062  | 4.84819  | 0.09628  |
| C | 4.77065  | -1.94382 | -0.17145 |
| C | 4.71239  | 0.95854  | 0.23419  |
| H | 5.37800  | -1.80851 | 0.72767  |
| H | 5.35168  | -1.56186 | -1.01532 |
| H | 4.61862  | -3.01237 | -0.32034 |
| H | 4.54010  | 2.02385  | 0.38500  |
| H | 5.29662  | 0.82972  | -0.68129 |
| H | 5.32933  | 0.58955  | 1.05839  |
| H | -4.54189 | -1.80337 | -0.13259 |
| H | -4.70529 | 1.49813  | 0.37135  |

**Compound 3 protonated at N1 - 6•N1-H<sup>+</sup>**

Energy: -596798.5088771 Hartrees

|   |          |          |          |
|---|----------|----------|----------|
| C | 3.44077  | 0.21749  | 0.10796  |
| C | 2.23419  | 0.88415  | 0.22890  |
| C | 1.02676  | 0.18145  | 0.18728  |
| C | 1.05052  | -1.22167 | 0.00031  |
| C | 2.29074  | -1.88561 | -0.11192 |
| C | 3.47662  | -1.20054 | -0.05811 |
| C | -1.22691 | -1.34064 | -0.01030 |
| C | -1.33129 | 0.06882  | 0.17351  |
| C | -3.78248 | -0.05695 | 0.09355  |
| C | -2.47718 | -2.16499 | -0.11961 |
| H | 2.25305  | 1.95992  | 0.33492  |
| H | 2.26016  | -2.96048 | -0.24711 |
| N | -0.08201 | -1.94796 | -0.08093 |
| N | -0.21661 | 0.79565  | 0.31661  |
| N | -2.55525 | 0.64008  | 0.21337  |
| N | -3.65299 | -1.41757 | -0.04249 |
| O | -2.48135 | -3.35003 | -0.25782 |
| O | -4.81587 | 0.54094  | 0.11664  |
| C | -0.30287 | 2.25049  | 0.57341  |
| C | -0.35868 | 3.06900  | -0.71475 |
| H | 0.55761  | 2.52086  | 1.18192  |
| H | -1.16948 | 2.42867  | 1.21334  |
| C | -0.43644 | 4.56209  | -0.41016 |
| H | 0.52909  | 2.84738  | -1.31428 |
| H | -1.22099 | 2.76079  | -1.31548 |
| H | -0.47121 | 5.13686  | -1.33604 |
| H | -1.33161 | 4.80822  | 0.16718  |
| H | 0.43484  | 4.89804  | 0.15807  |
| C | 4.78906  | -1.91893 | -0.17879 |
| C | 4.72226  | 0.99350  | 0.14758  |
| H | 5.40494  | -1.76274 | 0.71107  |
| H | 5.36008  | -1.55330 | -1.03652 |
| H | 4.63901  | -2.99083 | -0.30318 |
| H | 4.54670  | 2.06096  | 0.27853  |
| H | 5.28983  | 0.84833  | -0.77590 |
| H | 5.35715  | 0.64622  | 0.96753  |
| H | -4.52165 | -1.93381 | -0.12066 |
| H | -2.68208 | 1.64028  | 0.26687  |

## Coordinates for protonated propyl glycinate

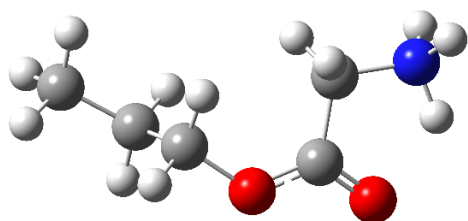

|   |           |           |           |
|---|-----------|-----------|-----------|
| C | -0.222209 | 1.385378  | 0.920989  |
| C | -0.923843 | 2.059664  | -0.258876 |
| H | 0.399942  | 2.098195  | 1.420709  |
| H | -0.954883 | 1.010218  | 1.604615  |
| C | -2.039102 | 3.012251  | 0.189509  |
| H | -0.199753 | 2.582367  | -0.887111 |
| H | -1.366014 | 1.277063  | -0.878761 |
| H | -2.339822 | 2.831134  | 1.226293  |
| H | -1.743696 | 4.056405  | 0.116800  |
| O | -3.178678 | 2.912486  | -0.681357 |
| C | -4.018203 | 1.892511  | -0.601766 |
| O | -4.821011 | 1.670362  | -1.465586 |
| N | -4.873459 | -0.149165 | 0.397541  |
| C | -3.980935 | 1.008281  | 0.647809  |
| H | -5.360419 | -0.014131 | -0.465382 |
| H | -5.533970 | -0.228329 | 1.144173  |
| H | -2.981889 | 0.609791  | 0.837031  |
| H | -4.325310 | 1.577839  | 1.512349  |
| H | 0.379194  | 0.575974  | 0.563107  |
| H | -4.327877 | -0.985577 | 0.345060  |
